# Supplementary material for: Effect of Salt Stress on Cytosine Methylation within GL2, An Arabidopsis thaliana Gene Involved in Root Epidermal Cell Differentiation. Absence of Inheritance in the Unstressed Progeny
Source: PubMed Central journal article supplement (PMC6769687; doi:10.3390/ijms20184446), 2019-09-10
Supplement: ijms-20-04446-s001.pdf [file ijms-20-04446-s001.pdf]

## Supplementary material

### A - Whole root

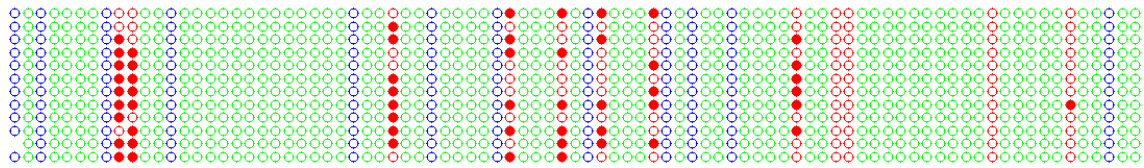

Non-stressed plants

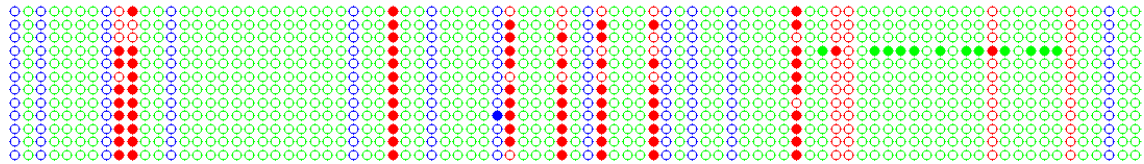

Mild saline-stressed plants

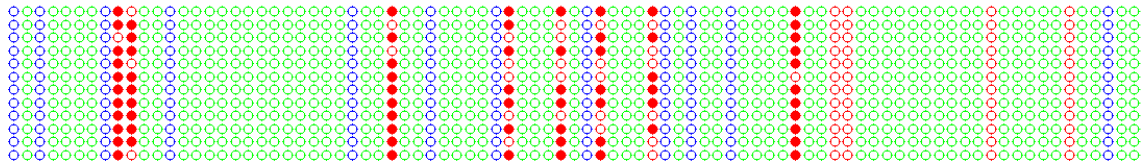

Non-stressed progeny of mild-saline stressed plants

### B - Epidermis only

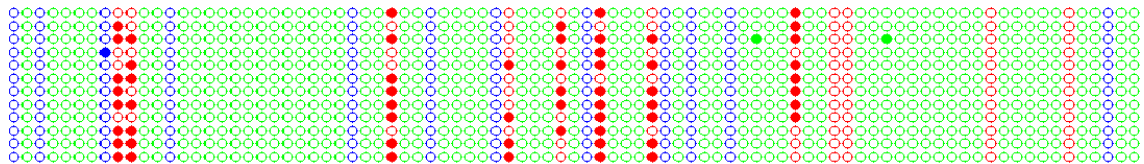

Non-stressed plants

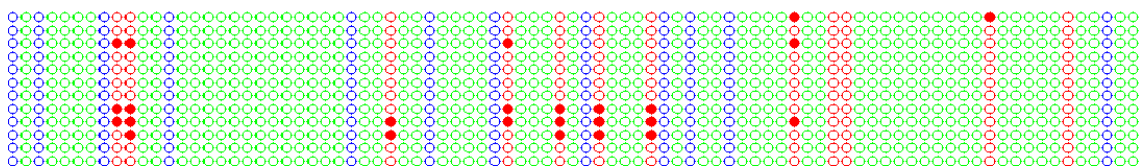

Mild saline-stressed plants

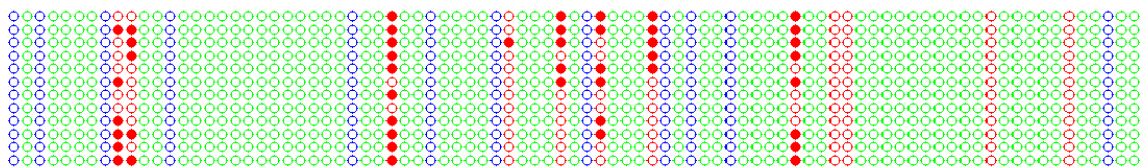

Non-stressed progeny of mild-saline stressed plants

**Figure S1.** Kismeth dotplots (Gruntman et al. 2008) showing the methylation pattern of a region of G12 in the root of non-stressed, mild-stressed and the non-stressed progeny of mild-stressed plants. **A) Total root.** **B) Epidermis.** Each line represents one clone, and each circle, one cytosine according to the order 5' - 3' (left - right) in which it appears in the DNA sequence. The colors blue, red and green correspond to cytosines located in the contexts -CHG-, -CG- and -CHH-, respectively. The filled circles indicate methylated cytosines, while the empty circles represent the unmethylated ones.

## A - Whole root

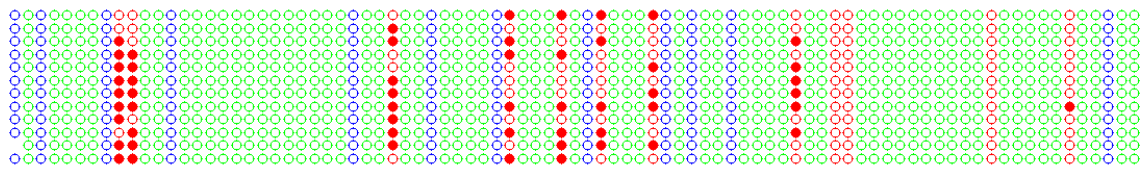

Non-stressed plants

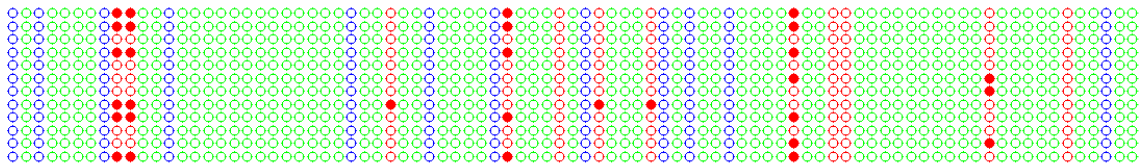

Severe saline-stressed plants

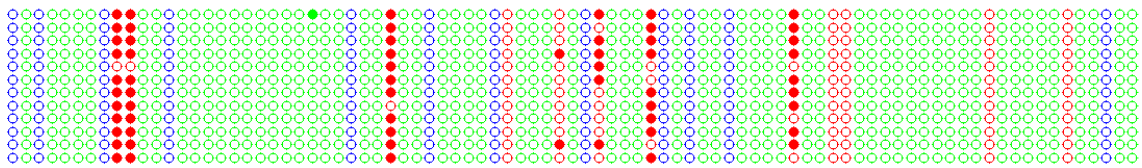

Non-stressed progeny of severe saline-stressed plants

## B - Epidermis only

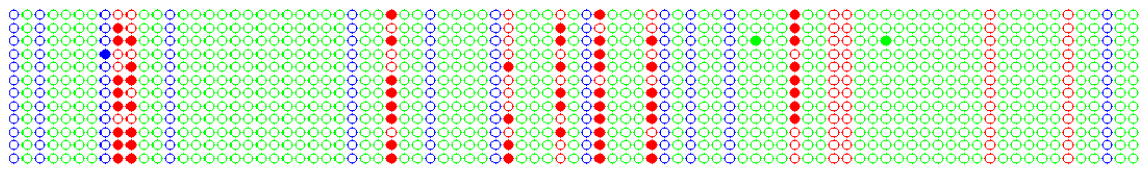

Non-stressed plants

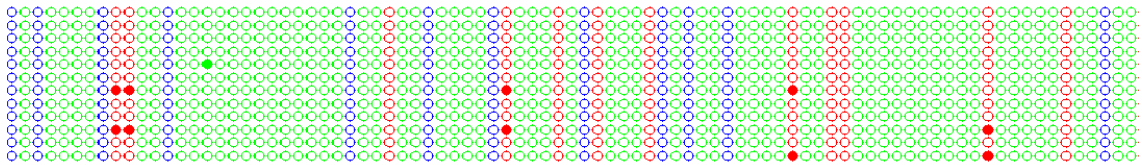

Severe saline-stressed plants

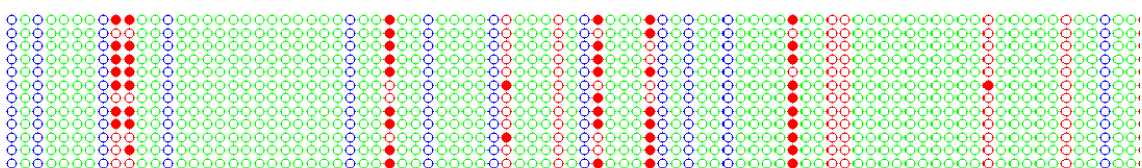

Non-stressed progeny of severe saline-stressed plants

**Figure S2.** Kismeth dotplots (Gruntman et al. 2008) showing the methylation pattern of a region of G12 in the root of non-stressed, severe-stressed and the non-stressed progeny of severe-stressed plants. **A) Total root.** **B) Epidermis.** Each line represents one clone, and each circle, one cytosine according to the order 5'-3' (left - right) in which it appears in the DNA sequence. The colors blue, red and green correspond to cytosines located in the contexts -CHG-, -CG- and -CHH-, respectively. The filled circles indicate methylated cytosines, while the empty circles represent the unmethylated ones.

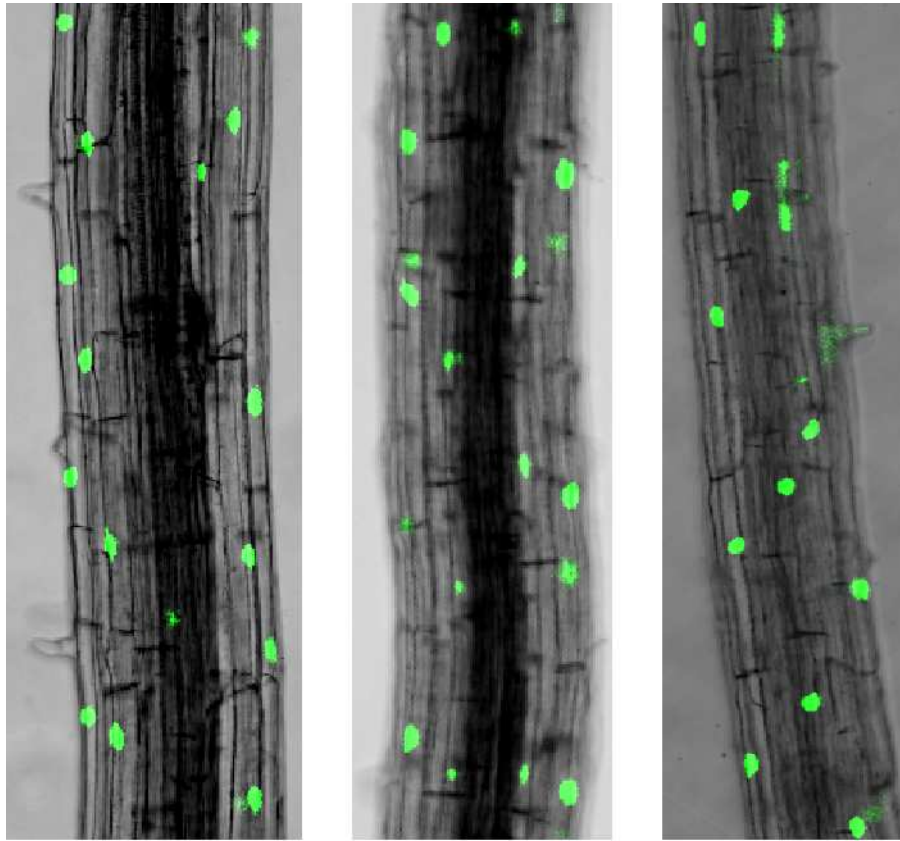

**MS 0.5X**

**MS 0.5X  
20 mM NaCl**

**MS 0.5X  
F1 plants**

**Figure S3.** Confocal images of roots of pExp7::GFP transgenic plants. From left to right: non-stressed plants, mild-saline (20 mM NaCl) stressed plants and the non-stressed progeny of mild-saline (20 mM NaCl) stressed plants (A = 100X).

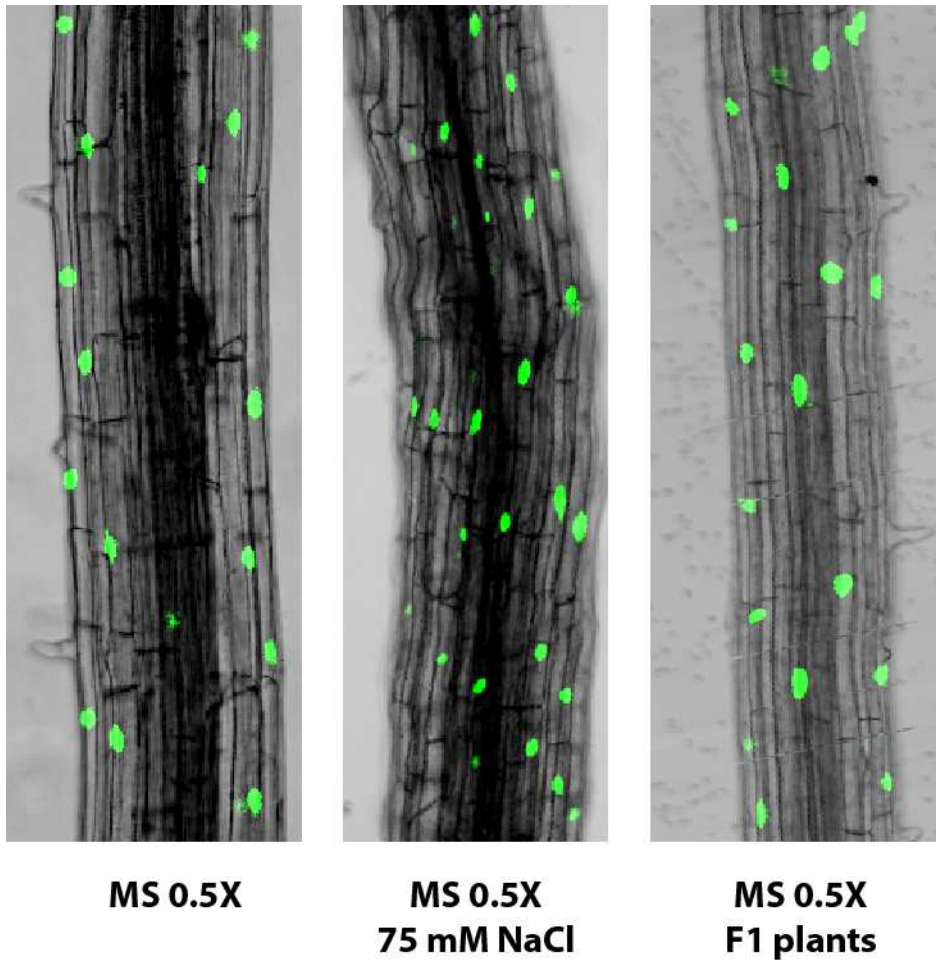

**Figure S4.** Confocal images of roots of pExp7::GFP transgenic plants. From left to right: non-stressed plants, severe-saline (75 mM NaCl) stressed plants and the non-stressed progeny of severe-saline (75 mM NaCl) stressed plants (A = 100X).
